# Supplementary material
Source: publisher figshare collection journal article supplement (https://acs.figshare.com/ndownloader/files/5678112)
Supplement: Supplementary file 1 [file 5678112]

 
data_is52 
 
_audit_creation_method            SHELXL-97 
_chemical_name_systematic 
; 
 ? 
; 
_chemical_name_common             ? 
_chemical_melting_point           ? 
_chemical_formula_moiety          ? 
_chemical_formula_sum 
 'C50 H56 Fe N2 O6' 
_chemical_formula_weight          836.82 
 
loop_ 
 _atom_type_symbol 
 _atom_type_description 
 _atom_type_scat_dispersion_real 
 _atom_type_scat_dispersion_imag 
 _atom_type_scat_source 
 'C'  'C'   0.0033   0.0016 
 'International Tables Vol C Tables 4.2.6.8 and 6.1.1.4' 
 'H'  'H'   0.0000   0.0000 
 'International Tables Vol C Tables 4.2.6.8 and 6.1.1.4' 
 'Fe'  'Fe'   0.3463   0.8444 
 'International Tables Vol C Tables 4.2.6.8 and 6.1.1.4' 
 'N'  'N'   0.0061   0.0033 
 'International Tables Vol C Tables 4.2.6.8 and 6.1.1.4' 
 'O'  'O'   0.0106   0.0060 
 'International Tables Vol C Tables 4.2.6.8 and 6.1.1.4' 
 
_symmetry_cell_setting            ? 
_symmetry_space_group_name_H-M    ? 
 
loop_ 
 _symmetry_equiv_pos_as_xyz 
 'x, y, z' 
 '-x, -y, -z' 
 '-x+1/2, y+1/2, -z+1/2' 
 'x+1/2, -y+1/2, z+1/2' 
 
_cell_length_a                    10.8013(12) 
_cell_length_b                    15.060(2) 
_cell_length_c                    26.755(3)
_cell_angle_alpha                 90 
_cell_angle_beta                  96.707(9) 
_cell_angle_gamma                 90 
_cell_volume                      4322.4(9) 
_cell_formula_units_Z             4 
_cell_measurement_temperature     293(2) 
_cell_measurement_reflns_used     ? 
_cell_measurement_theta_min       ?
_cell_measurement_theta_max       ? 
 
_exptl_crystal_description        ? 
_exptl_crystal_colour             ? 
_exptl_crystal_size_max           ? 
_exptl_crystal_size_mid           ? 
_exptl_crystal_size_min           ? 
_exptl_crystal_density_meas       ? 
_exptl_crystal_density_diffrn     1.286 
_exptl_crystal_density_method     'not measured' 
_exptl_crystal_F_000              1776 
_exptl_absorpt_coefficient_mu     0.401 
_exptl_absorpt_correction_type    ? 
_exptl_absorpt_correction_T_min   ? 
_exptl_absorpt_correction_T_max   ? 
_exptl_absorpt_process_details    ? 
 
_exptl_special_details 
; 
 ? 
; 
 
_diffrn_ambient_temperature       293(2) 
_diffrn_radiation_wavelength      0.71073 
_diffrn_radiation_type            MoK\a 
_diffrn_radiation_source          'fine-focus sealed tube' 
_diffrn_radiation_monochromator   graphite 
_diffrn_measurement_device_type   ? 
_diffrn_measurement_method        ? 
_diffrn_detector_area_resol_mean  ? 
_diffrn_standards_number          ? 
_diffrn_standards_interval_count  ? 
_diffrn_standards_interval_time   ? 
_diffrn_standards_decay_%         ? 
_diffrn_reflns_number             8009 
_diffrn_reflns_av_R_equivalents   0.0721 
_diffrn_reflns_av_sigmaI/netI     ? 
_diffrn_reflns_limit_h_min        0 
_diffrn_reflns_limit_h_max        12 
_diffrn_reflns_limit_k_min        0 
_diffrn_reflns_limit_k_max        17 
_diffrn_reflns_limit_l_min        -31 
_diffrn_reflns_limit_l_max        31 
_diffrn_reflns_theta_min          1.53 
_diffrn_reflns_theta_max          24.99 
_reflns_number_total              7575 
_reflns_number_gt                 7513 
_reflns_threshold_expression      >2sigma(I) 
 
_computing_data_collection        ? 
_computing_cell_refinement        ? 
_computing_data_reduction         ? 
_computing_structure_solution     'SHELXS-97 (Sheldrick, 1990)' 
_computing_structure_refinement   'SHELXL-97 (Sheldrick, 1997)' 
_computing_molecular_graphics     ? 
_computing_publication_material   ? 
 
_refine_special_details 
; 
 Refinement of F^2^ against ALL reflections.  The weighted R-factor wR and 
 goodness of fit S are based on F^2^, conventional R-factors R are based 
 on F, with F set to zero for negative F^2^. The threshold expression of 
 F^2^ > 2sigma(F^2^) is used only for calculating R-factors(gt) etc. and is 
 not relevant to the choice of reflections for refinement.  R-factors based 
 on F^2^ are statistically about twice as large as those based on F, and R- 
 factors based on ALL data will be even larger. 
; 
 
_refine_ls_structure_factor_coef  Fsqd  
_refine_ls_matrix_type            full 
_refine_ls_weighting_scheme       calc  
_refine_ls_weighting_details 
 'calc w=1/[\s^2^(Fo^2^)+(0.0536P)^2^+0.7896P] where P=(Fo^2^+2Fc^2^)/3' 
_atom_sites_solution_primary      direct 
_atom_sites_solution_secondary    difmap 
_atom_sites_solution_hydrogens    geom 
_refine_ls_hydrogen_treatment     mixed 
_refine_ls_extinction_method      none 
_refine_ls_extinction_coef        ? 
_refine_ls_abs_structure_details 
 'Flack H D (1983), Acta Cryst. A39, 876-881' 
_refine_ls_abs_structure_Flack    -10(10) 
_refine_ls_number_reflns          7513 
_refine_ls_number_parameters      534 
_refine_ls_number_restraints      0 
_refine_ls_R_factor_all           0.3277 
_refine_ls_R_factor_gt            0.1201 
_refine_ls_wR_factor_ref          0.3884 
_refine_ls_wR_factor_gt           0.3277 
_refine_ls_goodness_of_fit_ref    0.815 
_refine_ls_restrained_S_all       0.815 
 
loop_ 
 _atom_site_label 
 _atom_site_type_symbol 
 _atom_site_fract_x 
 _atom_site_fract_y 
 _atom_site_fract_z 
 _atom_site_U_iso_or_equiv 
 _atom_site_adp_type 
 _atom_site_occupancy 
 _atom_site_symetry_multiplicity 
 _atom_site_calc_flag 
 _atom_site_refinement_flags 
 _atom_site_disorder_assembly 
 _atom_site_disorder_group 

Fe Fe 0.5875(2) 0.5322(1) 0.2016(1) 0.049(1) Uani 1 1 d . . .
C1 C 0.6642(10) 0.6246(8) 0.2534(4) 0.046(3) Uani 1 1 d . . .
C2 C 0.5449(10) 0.6410(9) 0.2372(4) 0.062(4) Uani 1 1 d . . .
H2 H 0.4809 0.6402 0.2576 0.075 Uiso 1 1 calc R . .
C3 C 0.5276(11) 0.6601(8) 0.1843(5) 0.058(4) Uani 1 1 d . . .
H3 H 0.4553 0.6802 0.1655 0.069 Uiso 1 1 calc R . . 
C4 C 0.6409(13) 0.6423(9) 0.1672(5) 0.078(5) Uani 1 1 d . . .
H4 H 0.6533 0.6407 0.1334 0.093 Uiso 1 1 calc R . .
C5 C 0.7374(11) 0.6267(8) 0.2082(4) 0.061(4) Uani 1 1 d . . .
H5 H 0.8227 0.6197 0.2073 0.073 Uiso 1 1 calc R . .
C6 C 0.5917(10) 0.4102(10) 0.2326(4) 0.060(4) Uani 1 1 d . . .
C7 C 0.6524(11) 0.4063(8) 0.1890(4) 0.057(4) Uani 1 1 d . . .
H7 H 0.7339 0.3878 0.1871 0.069 Uiso 1 1 calc R . .
C8 C  0.5681(11) 0.4353(8) 0.1492(4) 0.057(3) Uani 1 1 d . . .
H8 H 0.5860 0.4431 0.1164 0.068 Uiso 1 1 calc R . .
C9 C  0.4514(11) 0.4512(10) 0.1661(4) 0.072(4) Uani 1 1 d . . .
H9 H 0.3789 0.4700 0.1469 0.087 Uiso 1 1 calc R . .
C10 C 0.4671(10) 0.4322(6) 0.2192(4) 0.044(3) Uani 1 1 d . . .
H10 H 0.4052 0.4343 0.2406 0.052 Uiso 1 1 calc R . .
C11 C 0.7344(13) 0.6072(9) 0.3040(4) 0.068(4) Uani 1 1 d . . .
H11 H 0.8205 0.6000 0.3082 0.081 Uiso 1 1 calc R . .
C12 C 0.6670(11) 0.6024(10) 0.3434(4) 0.072(4) Uani 1 1 d . . .
H12 H 0.5806 0.6072 0.3381 0.087 Uiso 1 1 calc R . .
C13 C 0.7324(10) 0.5890(7) 0.3961(4) 0.044(3) Uani 1 1 d . . .
C14 C 0.6506(11) 0.5789(9) 0.4340(4) 0.066(4) Uani 1 1 d . . .
H14 H 0.5644 0.5792 0.4266 0.079 Uiso 1 1 calc R . .
C15 C 0.7093(12) 0.5682(9) 0.4834(4) 0.072(4) Uani 1 1 d . . .
H15 H 0.6579 0.5580 0.5084 0.086 Uiso 1 1 calc R . .
C16 C 0.9021(11) 0.5756(9) 0.4614(4) 0.064(4) Uani 1 1 d . . .
H16 H 0.9875 0.5675 0.4692 0.077 Uiso 1 1 calc R . .
C17 C 0.8536(11) 0.5919(9) 0.4118(4) 0.065(4) Uani 1 1 d . . .
H17 H 0.9085 0.6054 0.3886 0.077 Uiso 1 1 calc R . .
C18 C 0.6524(11) 0.3841(8) 0.2840(4) 0.058(4) Uani 1 1 d . . .
H18 H 0.7380 0.3743 0.2888 0.070 Uiso 1 1 calc R . .
C19 C 0.5874(10) 0.3749(8) 0.3225(4) 0.057(4) Uani 1 1 d . . .
H19 H 0.5009 0.3782 0.3169 0.068 Uiso 1 1 calc R . .
C20 C 0.6493(11) 0.3590(7) 0.3753(4) 0.046(3) Uani 1 1 d . . .
C21 C 0.5651(11) 0.3550(8) 0.4129(4) 0.063(4) Uani 1 1 d . . .
H21 H 0.4791 0.3593 0.4050 0.075 Uiso 1 1 calc R . .
C22 C 0.6223(13) 0.3439(10) 0.4630(5) 0.078(5) Uani 1 1 d . . .
H22 H 0.5708 0.3419 0.4885 0.094 Uiso 1 1 calc R . .
C23 C 0.8177(11) 0.3387(9) 0.4385(4) 0.062(4) Uani 1 1 d . . .
H23 H 0.9033 0.3328 0.4470 0.074 Uiso 1 1 calc R . .
C24 C 0.7741(12) 0.3494(8) 0.3891(4) 0.055(3) Uani 1 1 d . . .
H24 H 0.8292 0.3501 0.3649 0.067 Uiso 1 1 calc R . .
C25 C 0.8247(13) 0.6116(9) 0.6202(4) 0.052(3) Uani 1 1 d . . .
C26 C 0.8744(11) 0.6112(8) 0.6752(4) 0.051(3) Uani 1 1 d . . .
C27 C 0.9773(9) 0.5656(9) 0.6968(4) 0.058(4) Uani 1 1 d . . .
H27 H 1.0229 0.5313 0.6765 0.070 Uiso 1 1 calc R . .
C28 C 0.0137(9) 0.5697(7) 0.7474(4) 0.045(3) Uani 1 1 d . . .
H28 H 1.0828 0.5376 0.7613 0.054 Uiso 1 1 calc R . .
C29 C 0.9469(11) 0.6226(9) 0.7784(4) 0.060(4) Uani 1 1 d . . .
C30 C 0.8422(11) 0.6696(10) 0.7576(4) 0.070(4) Uani 1 1 d . . .
H30 H 0.7980 0.7050 0.7778 0.084 Uiso 1 1 calc R . .
C31 C 0.8046(10) 0.6627(8) 0.7058(4) 0.053(3) Uani 1 1 d . . .
H31 H 0.7334 0.6923 0.6916 0.064 Uiso 1 1 calc R . .
C32 C 0.9424(11) 0.6805(9) 0.8610(4) 0.064(4) Uani 1 1 d . . .
H32A H 0.8528 0.6727 0.8594 0.077 Uiso 1 1 calc R . .
H32B H 0.9586 0.7405 0.8503 0.077 Uiso 1 1 calc R . .
C33 C 0.0019(10) 0.6663(9) 0.9144(4) 0.067(4) Uani 1 1 d . . .
H33A H 0.9784 0.6081 0.9256 0.081 Uiso 1 1 calc R . .
H33B H 0.9690 0.7100 0.9360 0.081 Uiso 1 1 calc R . .
C34 C 0.1447(11) 0.6731(9) 0.9210(4) 0.064(4) Uani 1 1 d . . .
H34A H 1.1792 0.6240 0.9037 0.077 Uiso 1 1 calc R . .
H34B H 1.1695 0.7279 0.9058 0.077 Uiso 1 1 calc R . .
C35 C 0.1957(11) 0.6714(9) 0.9753(4) 0.068(4) Uani 1 1 d . . .
H35A H 1.1688 0.6170 0.9901 0.081 Uiso 1 1 calc R . .
H35B H 1.1605 0.7207 0.9922 0.081 Uiso 1 1 calc R . .
C36 C 0.3348(14) 0.6768(10) 0.9848(5) 0.088(5) Uani 1 1 d . . .
H36A H 1.3612 0.7298 0.9684 0.106 Uiso 1 1 calc R . .
H36B H 1.3692 0.6262 0.9687 0.106 Uiso 1 1 calc R . .
C37 C 0.3919(12) 0.6789(12) 1.0398(5) 0.115(6) Uani 1 1 d . . .
H37A H 1.3769 0.7358 1.0540 0.172 Uiso 1 1 calc R . .
H37B H 1.4800 0.6688 1.0416 0.172 Uiso 1 1 calc R . .
H37C H 1.3546 0.6333 1.0582 0.172 Uiso 1 1 calc R . .
C38 C 0.7504(13) 0.3653(9) 0.6010(5) 0.063(4) Uani 1 1 d . . .
C39 C 0.8039(12) 0.3559(9) 0.6553(4) 0.059(4) Uani 1 1 d . . .
C40 C 0.7354(10) 0.4061(8) 0.6890(4) 0.052(3) Uani 1 1 d . . .
H40 H 0.6651 0.4385 0.6767 0.063 Uiso 1 1 calc R . .
C41 C 0.7759(12) 0.4049(10) 0.7391(5) 0.076(4) Uani 1 1 d . . .
H41 H 0.7307 0.4362 0.7608 0.091 Uiso 1 1 calc R . .
C42 C 0.8775(12) 0.3609(10) 0.7585(4) 0.068(4) Uani 1 1 d . . .
C43 C 0.9422(10) 0.3053(8) 0.7258(4) 0.058(4) Uani 1 1 d . . .
H43 H 1.0092 0.2700 0.7386 0.070 Uiso 1 1 calc R . .
C44 C 0.9012(11) 0.3063(9) 0.6747(4) 0.058(4) Uani 1 1 d . . .
H44 H 0.9424 0.2715 0.6532 0.069 Uiso 1 1 calc R . .
C45 C 0.8655(11) 0.3996(9) 0.8432(4) 0.062(4) Uani 1 1 d . . .
H45A H 0.7780 0.3835 0.8407 0.074 Uiso 1 1 calc R . .
H45B H 0.8711 0.4625 0.8362 0.074 Uiso 1 1 calc R . .
C46 C 0.9278(11) 0.3800(10) 0.8957(4) 0.068(4) Uani 1 1 d . . .
H46A H 0.8879 0.4153 0.9196 0.081 Uiso 1 1 calc R . .
H46B H 0.9145 0.3180 0.9033 0.081 Uiso 1 1 calc R . .
C47 C 1.0631(11) 0.3983(10) 0.9030(4) 0.068(4) Uani 1 1 d . . .
H47A H 1.0789 0.4548 0.8875 0.082 Uiso 1 1 calc R . .
H47B H 1.1063 0.3526 0.8863 0.082 Uiso 1 1 calc R . .
C48 C 1.1148(12) 0.4012(10) 0.9586(4) 0.072(4) Uani 1 1 d . . .
H48A H 1.0757 0.4502 0.9743 0.086 Uiso 1 1 calc R . .
H48B H 1.0909 0.3469 0.9744 0.086 Uiso 1 1 calc R . .
C49 C 1.2502(12) 0.4112(10) 0.9690(4) 0.074(4) Uani 1 1 d . . .
H49A H 1.2742 0.4659 0.9536 0.089 Uiso 1 1 calc R . .
H49B H 1.2895 0.3626 0.9531 0.089 Uiso 1 1 calc R . .
C50 C 1.3016(12) 0.4131(10) 1.0253(4) 0.091(5) Uani 1 1 d . . .
H50A H 1.3903 0.4217 1.0286 0.137 Uiso 1 1 calc R . .
H50B H 1.2831 0.3578 1.0407 0.137 Uiso 1 1 calc R . .
H50C H 1.2635 0.4609 1.0417 0.137 Uiso 1 1 calc R . .
N1 N 0.8286(9) 0.5714(7) 0.4974(3) 0.064(3) Uani 1 1 d . . .
N2 N 0.7446(11) 0.3362(7) 0.4760(4) 0.063(3) Uani 1 1 d . . .
O1 O 0.9023(8) 0.5673(6) 0.5936(3) 0.068(3) Uani 1 1 d . . .
H1 H 0.8864 0.5141 0.5941 0.102 Uiso 1 1 calc R . .
O2 O 0.7339(8) 0.6484(7) 0.6022(3) 0.077(3) Uani 1 1 d . . .
O3 O 0.9930(7) 0.6174(5) 0.8280(3) 0.059(2) Uani 1 1 d . . .
O4 O 0.8308(8) 0.3233(7) 0.5723(3) 0.079(3) Uani 1 1 d . . .
H4A H 0.7905 0.2977 0.5487 0.119 Uiso 1 1 calc R . .
O5 O 0.6544(8) 0.3930(7) 0.5850(3) 0.089(3) Uani 1 1 d . . .
O6 O 0.9262(7) 0.3494(6) 0.8073(3) 0.067(3) Uani 1 1 d . . .

loop_ 
 _atom_site_aniso_label 
 _atom_site_aniso_U_11 
 _atom_site_aniso_U_22 
 _atom_site_aniso_U_33 
 _atom_site_aniso_U_23 
 _atom_site_aniso_U_13 
 _atom_site_aniso_U_12 
Fe   0.039(1) 0.073(1) 0.035(1) -0.003(1) 0.006(1) -0.002(1) 
C(1) 0.043(7) 0.042(8) 0.052(7) -0.008(6) 0.002(6) 0.012(6) 
C(2) 0.026(7) 0.110(12) 0.049(8) 0.008(7) 0.001(5) -0.033(8) 
C(3) 0.033(7) 0.057(9) 0.080(9) 0.001(7) -0.009(6) -0.009(7) 
C(4) 0.076(10) 0.106(13) 0.048(8) -0.015(8) -0.001(7) 0.061(9) 
C(5) 0.051(8) 0.054(9) 0.078(9) -0.013(7) 0.012(7) -0.022(7) 
C(6) 0.023(7) 0.119(13) 0.038(7) -0.029(7) -0.004(5) 0.010(7) 
C(7) 0.041(7) 0.066(10) 0.068(9) -0.019(7) 0.017(7) -0.031(7) 
C(8) 0.056(8) 0.063(10) 0.051(7) 0.013(6) 0.008(6) 0.009(7) 
C(9) 0.042(7) 0.118(13) 0.051(7) 0.001(8) -0.023(6) -0.028(9) 
C(10) 0.037(7) 0.024(7) 0.071(8) 0.005(6) 0.011(6) -0.020(6) 
C(11) 0.080(9) 0.082(11) 0.040(7) -0.016(7) 0.005(7) -0.003(8) 
C(12) 0.045(8) 0.130(14) 0.039(7) -0.014(8) -0.009(6) 0.013(8) 
C(13) 0.042(7) 0.046(8) 0.043(7) -0.007(6) 0.000(6) 0.015(6) 
C(14) 0.049(8) 0.093(11) 0.058(8) -0.023(7) 0.011(7) -0.007(8) 
C(15) 0.045(8) 0.122(14) 0.049(8) -0.013(8) 0.008(6) 0.002(8) 
C(16) 0.051(8) 0.081(10) 0.059(8) -0.021(7) -0.002(7) -0.005(7) 
C(17) 0.050(8) 0.097(11) 0.044(7) -0.005(7) -0.006(6) -0.008(8) 
C(18) 0.049(8) 0.068(10) 0.060(8) -0.002(7) 0.016(7) 0.002(7) 
C(19) 0.034(7) 0.091(11) 0.041(7) -0.001(7) -0.013(6) -0.006(7) 
C(20) 0.062(8) 0.019(7) 0.052(7) 0.016(6) -0.009(6) -0.007(6) 
C(21) 0.049(7) 0.080(11) 0.062(8) 0.003(7) 0.019(7) 0.001(8) 
C(22) 0.059(9) 0.121(15) 0.059(9) 0.020(8) 0.023(7) 0.022(9) 
C(23) 0.043(7) 0.088(11) 0.052(8) 0.010(7) 0.001(6) -0.012(7) 
C(24) 0.062(9) 0.049(9) 0.054(8) -0.004(6) 0.001(6) 0.004(7) 
C(25) 0.067(9) 0.047(9) 0.043(8) -0.004(6) 0.013(7) -0.004(8) 
C(26) 0.043(7) 0.065(10) 0.046(7) -0.008(6) 0.009(6) -0.003(7) 
C(27) 0.027(6) 0.107(12) 0.040(7) 0.002(7) -0.003(5) 0.002(7) 
C(28) 0.033(6) 0.060(9) 0.040(6) 0.015(6) -0.004(5) 0.010(6) 
C(29) 0.055(8) 0.089(11) 0.035(7) 0.006(7) 0.007(6) -0.006(8) 
C(30) 0.053(8) 0.109(13) 0.051(8) 0.005(8) 0.019(7) 0.020(9) 
C(31) 0.027(6) 0.085(10) 0.047(8) 0.013(7) 0.000(5) 0.020(7) 
C(32) 0.070(9) 0.071(10) 0.049(8) -0.025(7) -0.007(7) 0.015(8) 
C(33) 0.056(8) 0.105(12) 0.044(7) -0.014(7) 0.018(6) 0.045(8) 
C(34) 0.079(10) 0.075(10) 0.037(7) -0.003(6) 0.000(6) 0.023(8) 
C(35) 0.059(9) 0.089(11) 0.055(8) -0.009(7) 0.007(7) -0.016(8) 
C(36) 0.128(15) 0.063(11) 0.074(10) -0.013(8) 0.015(9) 0.004(10) 
C(37) 0.071(10) 0.197(20) 0.071(10) -0.030(11)0.013(8) -0.019(12) 
C(38) 0.048(9) 0.063(11) 0.078(10) 0.005(8) 0.011(8) -0.028(8) 
C(39) 0.061(9) 0.062(10) 0.055(8) 0.016(7) 0.009(7) -0.016(8) 
C(40) 0.024(6) 0.065(9) 0.068(9) 0.000(7) 0.001(6) 0.013(6) 
C(41) 0.048(9) 0.122(14) 0.057(9) -0.012(8) 0.001(7) -0.006(9) 
C(42) 0.052(8) 0.112(13) 0.039(8) -0.013(8) 0.006(7) 0.0011(9) 
C(43) 0.045(7) 0.072(10) 0.054(8) 0.022(7) -0.010(6) -0.002(7) 
C(44) 0.054(8) 0.073(11) 0.048(8) -0.001(7) 0.013(6) -0.009(8) 
C(45) 0.058(8) 0.067(10) 0.062(8) -0.007(7) 0.015(7) 0.020(8) 
C(46) 0.056(8) 0.108(12) 0.040(7) 0.004(7) 0.009(6) 0.014(8) 
C(47) 0.054(8) 0.116(13) 0.036(7) -0.006(7) 0.011(6) -0.024(9) 
C(48) 0.077(10) 0.074(11) 0.069(9) 0.024(8) 0.029(8) 0.007(9) 
C(49) 0.082(11) 0.087(12) 0.053(8) 0.011(7) 0.010(7) 0.018(9) 
C(50) 0.094(11) 0.115(13) 0.067(10) -0.004(9) 0.014(8) 0.041(10) 
N(1) 0.047(7) 0.096(9) 0.050(6) 0.004(6) 0.012(5) 0.002(6) 
N(2) 0.087(9) 0.048(7) 0.053(7) 0.011(5) 0.004(6) -0.009(7) 
O(1) 0.060(5) 0.098(8) 0.047(5) -0.006(5) 0.010(4) -0.005(6) 
O(2) 0.063(6) 0.104(9) 0.061(6) 0.004(5) -0.003(5) 0.036(6) 
O(3) 0.072(6) 0.057(6) 0.046(5) 0.004(4) 0.001(4) 0.013(5) 
O(4) 0.073(6) 0.115(9) 0.047(5) -0.004(5) -0.005(5) 0.005(6) 
O(5) 0.039(5) 0.155(11) 0.068(6) -0.008(6) -0.016(4) 0.027(6) 
O(6) 0.058(5) 0.099(7) 0.042(5) -0.001(5) 0.000(4) 0.012(5)
 
_geom_special_details 
; 
 All esds (except the esd in the dihedral angle between two l.s. planes) 
 are estimated using the full covariance matrix.  The cell esds are taken 
 into account individually in the estimation of esds in distances, angles 
 and torsion angles; correlations between esds in cell parameters are only 
 used when they are defined by crystal symmetry.  An approximate (isotropic) 
 treatment of cell esds is used for estimating esds involving l.s. planes. 
; 
 
loop_ 
 _geom_bond_atom_site_label_1 
 _geom_bond_atom_site_label_2 
 _geom_bond_distance 
 _geom_bond_site_symmetry_2 
 _geom_bond_publ_flag 
Fe C2 1.976(14) . ?
Fe C4 2.01(2) . ?
Fe C6 2.02(2) . ?
Fe C8 2.016(12) . ?
Fe C9 2.055(11) . ?
Fe C7 2.063(13) . ?
Fe C3 2.067(13) . ?
Fe C1 2.068(11) . ?
Fe C10 2.080(10) . ?
Fe C5 2.148(11) . ?
C1 C2 1.333(14) . ?
C1 C1 1.496(14) . ?
C1 C5 1.520(14) . ?
C2 C3 1.434(14) . ?
C3 C4 1.38(2) . ?
C4 C5 1.44(2) . ?
C6 C10 .392(14) . ?
C6 C7 1.406(14) . ?
C6 C18 1.50(2) . ?
C7 C8 1.387(14) . ?
C8 C9 1.409(14) . ?
C9 C10 1.439(14) . ?
C11 C12 1.35(2) . ?
C12 C13 1.516(14) . ?
C13 C17 1.328(14) . ?
C13 C14 1.429(14) . ?
C14 C15 1.40(2) . ?
C15 N1 1.300(13) . ?
C16 N1 1.321(13) . ?
C16 C17 1.389(14) . ?
C18 C19 1.320(13) . ?
C19 C20 1.509(13) . ?
C20 C24 1.36(2) . ?
C20 C21 1.43(2) . ?
C21 C22 1.42(2) . ?
C22 N2 1.33(2) . ?
C23 N2 1.347(13) . ?
C23 C24 1.360(14) . ?
C25 O2 1.179(13) . ?
C25 O1 1.339(13) . ?
C25 C26 1.51(2) . ?
C26 C27 1.374(14) . ?
C26 C31 1.410(14) . ?
C27 C28 1.367(13) . ?
C28 C29 1.41(2) . ?
C29 O3 1.364(12) . ?
C29 C30 1.39(2) . ?
C30 C31 1.401(14) . ?
C32 O3 1.448(12) . ?
C32 C33 1.512(14) . ?
C33 C34 1.53(2) . ?
C34 C35 1.493(14) . ?
C35 C36 1.50(2) . ?
C36 C37 1.53(2) . ?
C38 O5 1.153(14) . ?
C38 O4 1.38(2) . ?
C38 C39 1.51(2) . ?
C39 C44 1.34(2) . ?
C39 C40 1.44(2) . ?
C40 C41 1.36(2) . ?
C41 C42 1.33(2) . ?
C42 O6 1.360(13) . ?
C42 C43 1.45(2) . ?
C43 C44 1.385(14) . ?
C45 O6 1.440(12) . ?
C45 C46 1.514(14) . ?
C46 C47 1.48(2) . ?
C47 C48 1.527(14) . ?
C48 C49 1.46(2) . ?
C49 C50 1.545(14) . ?

loop_ 
 _geom_angle_atom_site_label_1 
 _geom_angle_atom_site_label_2 
 _geom_angle_atom_site_label_3 
 _geom_angle 
 _geom_angle_site_symmetry_1 
 _geom_angle_site_symmetry_3 
 _geom_angle_publ_flag 

C2 Fe-C4 68.4(4) 
C2 Fe-C6 123.5(4) 
C4 Fe-C6 161.0(5) 
C2 Fe-C8 157.5(5) 
C4 Fe-C8 106.9(5) 
C6 Fe-C8 67.8(5) 
C2 Fe-C9 121.4(5) 
C4 Fe-C9 120.4(5) 
C6 Fe-C9 68.2(5) 
C8 Fe-C9 40.5(4) 
C2 Fe-C7 160.6(5) 
C4 Fe-C7 124.2(5) 
C6 Fe-C7 40.3(4) 
C8 Fe-C7 39.7(4) 
C9 Fe-C7 67.5(5) 
C2 Fe-C3 41.5(4) 
C4 Fe-C3 39.6(4) 
C6 Fe-C3 159.0(5) 
C8 Fe-C3 121.0(5) 
C9 Fe-C3 105.2(5) 
C7 Fe-C3 157.5(5) 
C2 Fe-C1 38.4(4) 
C4 Fe-C1 68.8(5) 
C6 Fe-C1 110.4(4) 
C8 Fe-C1 162.4(5) 
C9 Fe-C1 156.6(5) 
C7 Fe-C1 127.6(4) 
C3 Fe-C1 67.2(4) 
C2 Fe-C10 107.7(4) 
C4 Fe-C10 157.0(5) 
C6 Fe-C10 39.7(4) 
C8 Fe-C10 67.5(4) 
C9 Fe-C10 40.7(4) 
C7 Fe-C10 66.7(4) 
C3 Fe-C10 122.6(5) 
C1 Fe-C10 123.2(4) 
C2 Fe-C5 68.0(4) 
C4 Fe-C5 40.4(4) 
C6 Fe-C5 126.1(5) 
C8 Fe-C5 123.6(5) 
C9 Fe-C5 157.5(5) 
C7 Fe-C5 110.8(5) 
C3 Fe-C5  67.3(5) 
C1 Fe-C5  42.2(4) 
C10 Fe-C5 161.1(4) 
C2 C1 C11 134.1(11) 
C2 C1 C5 108.1(10) 
C11 C1 C5 117.8(10) 
C2 C1 Fe 67.1(8) 
C11 C1 Fe 127.6(9) 
C5 C1 Fe 71.7(6) 
C1 C2 C3 111.6(10) 
C1 C2 Fe 74.5(8) 
C3 C2 Fe 72.6(7) 
C4 C3 C2 105.7(10) 
C4 C3 Fe 68.1(8) 
C2 C3 Fe 65.9(7) 
C3 C4 C5 111.6(11) 
C3 C4 Fe 72.3(9) 
C5 C4 Fe 74.8(7) 
C4 C5 C1 102.2(10) 
C4 C5 Fe 64.8(8) 
C1 C5 Fe 66.1(6) 
C10 C6 C7 109.1(11) 
C10 C6 C18 127.1(10) 
C7 C6 C18 123.5(11) 
C10 C6 Fe 72.6(7) 
C7 C6 Fe 71.7(8) 
C18 C6 Fe 26.9(9) 
C8 C7 C6 107.2(11) 
C8 C7 Fe 68.3(8) 
C6 C7 Fe 68.0(8) 
C7 C8 C9 109.9(10) 
C7 C8 Fe 71.9(7) 
C9 C8 Fe 71.3(7) 
C8 C9 C10 106.0(10) 
C8 C9 Fe 68.3(7) 
C10 C9 Fe 70.5(5) 
C6 C10 C9 107.5(10) 
C6 C10 Fe 67.6(7) 
C9 C10 Fe 68.7(6) 
C12 C11 C1 116.9(12) 
C11 C12 C13 119.8(11) 
C17 C13 C14 116.5(10) 
C17 C13 C12 128.7(11) 
C14 C13 C12 114.6(10) 
C15 C14 C13 115.5(11) 
N1 C15 C14 126.1(12) 
N1 C16 C17 120.9(12) 
C13 C17 C16 123.0(12) 
C19 C18 C6  121.7(11) 
C18 C19 C20 121.9(11) 
C24 C20 C21 119.5(11) 
C24 C20 C19 126.0(11) 
C21 C20 C19 114.6(11) 
C22 C21 C20 115.2(11) 
N2 C22 C21 124.6(11) 
N2 C23 C24 124.0(11) 
C23 C24 C20 119.8(12) 
O2 C25 O1 124.1(11) 
O2 C25 C26 125.7(12) 
O1 C25 C26 110.1(11) 
C27 C26 C31 119.4(10) 
C27 C26 C25 126.2(11) 
C31 C26 C25 114.3(11) 
C28 C27 C26 121.3(11) 
C27 C28 C29 120.1(10) 
O3 C29 C30 127.3(11) 
O3 C29 C28 112.7(11) 
C30 C29 C28 119.9(10) 
C29 C30 C31 119.1(11) 
C30 C31 C26 120.2(11) 
O3 C32 C33 109.5(9) 
C32 C33 C34 114.2(10) 
C35 C34 C33 111.2(9) 
C34 C35 C36 114.5(10) 
C35 C36 C37 116.7(11) 
O5 C38 O4 123.9(13) 
O5 C38 C39 128.2(14) 
O4 C38 C39 107.4(12) 
C44 C39 C40 118.9(11) 
C44 C39 C38 128.3(13) 
C40 C39 C38 112.7(13) 
C41 C40 C39 118.6(11) 
C42 C41 C40 123.1(13) 
C41 C42 O6 130.2(12) 
C41 C42 C43 119.0(11) 
O6 C42 C43 110.3(11) 
C44 C43 C42 117.9(11) 
C39 C44 C43 122.2(12) 
O6 C45 C46 109.3(9) 
C47 C46 C45 114.3(10) 
C46 C47 C48 112.1(10) 
C49 C48 C47 115.6(10) 
C48 C49 C50 115.2(11) 
C15 N1 C16 116.8(11) 
C22 N2 C23 116.9(10) 
C29 O3 C32 115.8(9) 
C42 O6 C45 114.7(9) 
